# Supplementary material for: CO2 conversion by solar photothermo co-catalysis on montmorillonite-based catalysts
Source: Springer Nature journal article supplement (doi:10.1007/s42452-025-06622-0), 2025-02-26
Supplement: MOESM1 [file 42452_2025_6622_MOESM1_ESM%20%281%29.docx]

**CO2 conversion by solar photothermo co-catalysis on Montmorillonite-based catalysts**

Giusy Dativo1, Marcello Condorelli1, Giuseppe Compagnini1, Giuliana Impellizzeri2, Salvatore Scirè1 and Roberto Fiorenza1,2*

1Department of Chemical Sciences, University of Catania,V.le A. Doria 6, Catania 95125, Italy

2Institute for Microelectronics and Microsystems (IMM), National Research Council (CNR), Via S. Sofia 64, Catania 95123, Italy

*corresponding author: [rfiorenza@unict.it](mailto:rfiorenza@unict.it)

**Supporting information**

- **UV-DRS measurements**


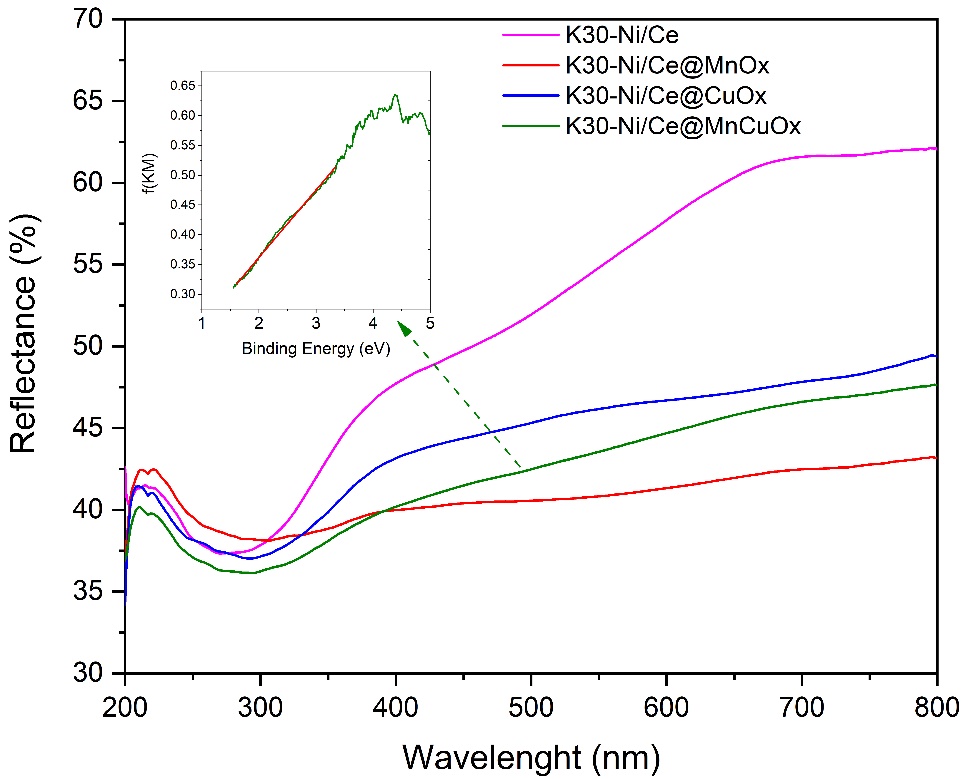


Figure S1 UV-DRS spectra of the examined samples. In the inset the plot of modified Kubelka function evaluated for the estimation of the optical band gap (K30-Ni/Ce@MnCuOx chosen as representative sample).

- **SEM, EDX spectrum and Raman intensity map (peak at 490 cm-1) of K30-Ni/Ce@MnCuOx**


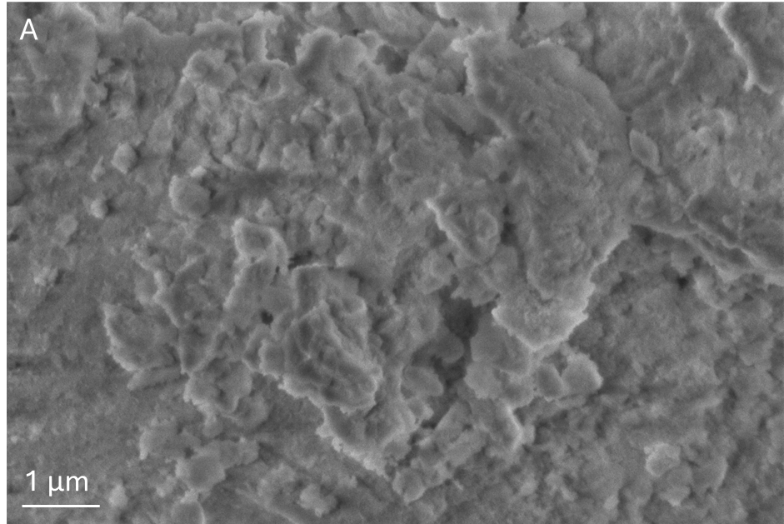


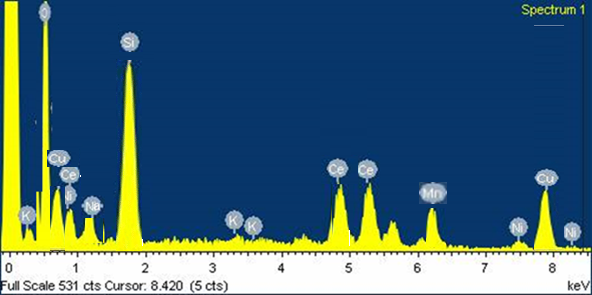


B


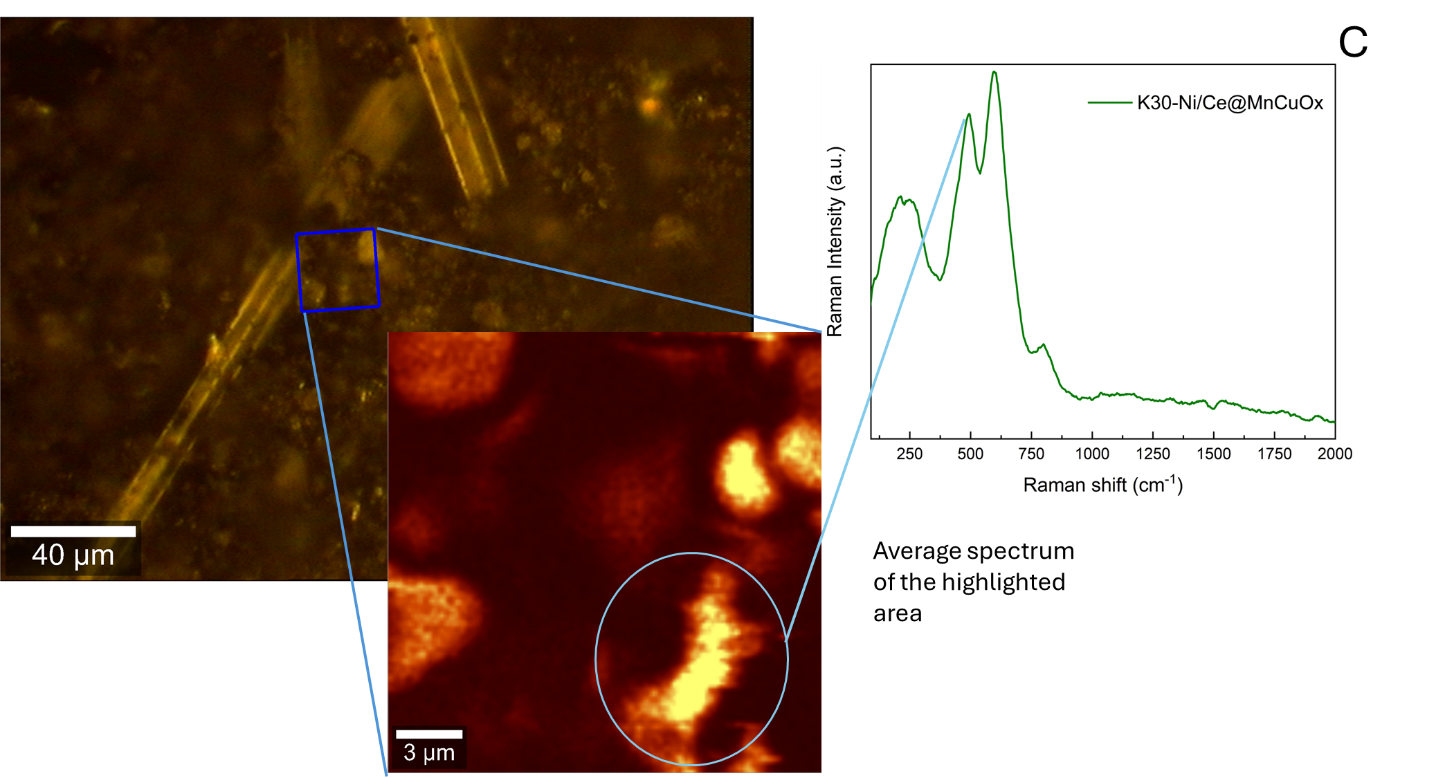


Figure S2 (A) SEM image of the K30-Ni/Ce@MnCuOx catalyst as representative sample. The other K30-based composites showed a similar morphology; (B) EDX spectrum; (C) Raman Intensity map.

Table S1 Elements detected by EDX for the K30-Ni/Ce@MnCuOx catalyst.

| Element | Weight% |
| --- | --- |
| O | 44.2 |
| Si | 20.3 |
| K | 0.7 |
| Ni | 7.4 |
| Ce | 7.1 |
| Mn | 4.6 |
| Cu | 5.1 |
| Al | 7.1 |
| Na | 2.3 |
| Mg | 1.2 |

- **EDX analysis of K30-Ni/Ce, K30-Ni/Ce@MnOx and K30-Ni/Ce@CuOx**

Table S2 Elements detected by EDX for the K30-Ni/Ce@MnOx catalyst.

| Element | Weight% |
| --- | --- |
| O | 42.5 |
| Si | 22.6 |
| K | 0.4 |
| Ni | 7.3 |
| Ce | 7.4 |
| Mn | 9.4 |
| Al | 7.0 |
| Na | 2.1 |
| Mg | 1.3 |

Table S3 Elements detected by EDX for the K30-Ni/Ce@CuOx catalyst.

| Element | Weight% |
| --- | --- |
| O | 41.5 |
| Si | 22.7 |
| K | 0.4 |
| Ni | 7.1 |
| Ce | 7.0 |
| Cu | 10.6 |
| Al | 6.8 |
| Na | 2.2 |
| Mg | 1.7 |

Table S4 Elements detected by EDX for the K30-Ni/Ce catalyst.

| Element | Weight% |
| --- | --- |
| O | 45.4 |
| Si | 28.7 |
| K | 0.4 |
| Ni | 7.6 |
| Ce | 7.4 |
| Al | 6.5 |
| Na | 2.5 |
| Mg | 1.5 |

- **XPS spectra in the Cu 2p region of K30-Ni/Ce@CuOx and K30-Ni/Ce@MnCuOx samples**


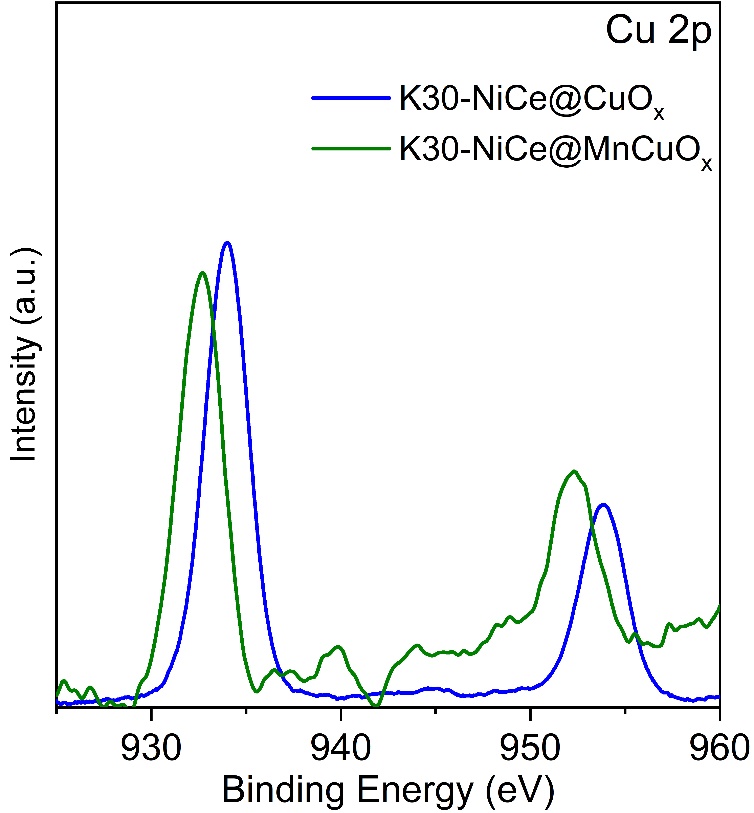


Figure S3 XPS spectra of the examined samples measured in the Cu 2p binding energy region.

- **Photothermo-catalytic activity of Bentonite-Ni/Ce@MnCuOx and K30-Ni/Ce@MnCuOx**


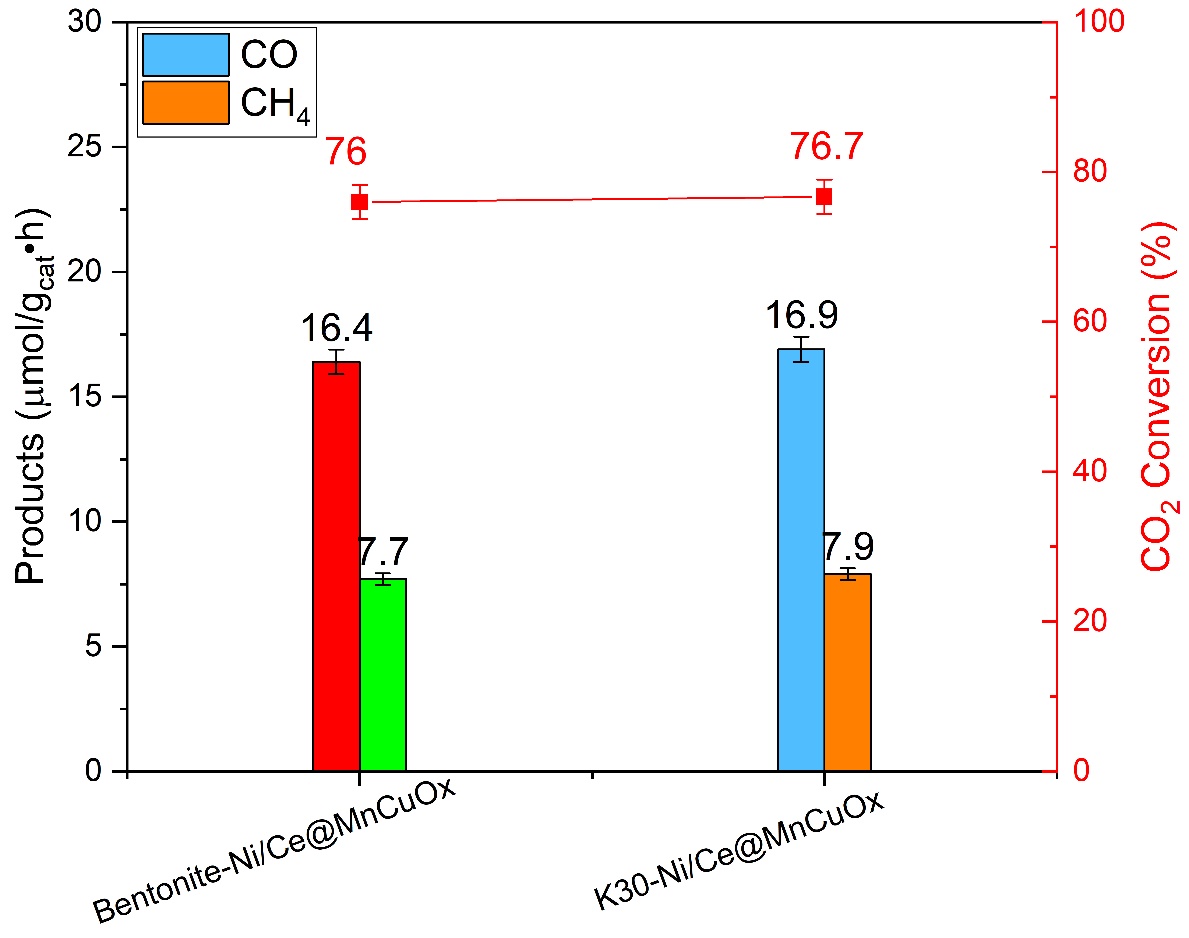


Figure S4. Photothermo-catalytic CO2 conversion at T = 120 °C after 5 h of simulated solar irradiation on the investigated samples.
